# Supplementary material for: Factors promoting or inhibiting normal birth
Source: PubMed Central journal article supplement (PMC6006773; doi:10.1186/s12884-018-1871-5), 2018-06-18
Supplement: 12884_2018_1871_MOESM1_ESM.pdf [file 12884_2018_1871_MOESM1_ESM.pdf]

Additional File 1. Comparison of Respondent Sample and Population Characteristics

Table 1. Maternal characteristics: Comparison of survey respondents and women who gave birth in Queensland in 2011.

| Maternal Characteristics             | Survey Sample<br>(N=5,840) |      | Queensland Population 2011<br>(N=61,125) <sup>1</sup> |      |
|--------------------------------------|----------------------------|------|-------------------------------------------------------|------|
|                                      | N                          | %    | N                                                     | %    |
| <b>Maternal Age in Years</b>         |                            |      |                                                       |      |
| Less than 20                         | 104                        | 1.9  | 3,120                                                 | 5.1  |
| 20-24                                | 638                        | 11.5 | 10,307                                                | 16.9 |
| 25-29                                | 1,639                      | 29.4 | 17,835                                                | 29.2 |
| 30-34                                | 1,920                      | 34.5 | 17,688                                                | 28.9 |
| 35-39                                | 1,039                      | 18.6 | 9,955                                                 | 16.3 |
| 40 and over                          | 232                        | 4.2  | 2,220                                                 | 3.6  |
| <i>Not stated</i>                    | 268                        |      | 0                                                     |      |
| <b>Indigenous Identification</b>     |                            |      |                                                       |      |
| Aboriginal or Torres Strait Islander | 89                         | 1.6  | 3,646                                                 | 6.0  |
| Non-Indigenous                       | 5,536                      | 98.4 | 57,453                                                | 94.0 |
| <i>Not stated</i>                    | 215                        |      | 13                                                    |      |
| <b>Area of Residence<sup>2</sup></b> |                            |      |                                                       |      |
| Major city                           | 3,514                      | 62.5 | 37,134                                                | 61.3 |
| Inner regional                       | 1,059                      | 18.8 | 11,529                                                | 19.0 |
| Outer regional                       | 845                        | 15.0 | 9,407                                                 | 15.5 |
| Remote & very remote                 | 151                        | 2.7  | 2,522                                                 | 4.2  |
| Not applicable/Outside QLD           | 55                         | 1.0  | n/a                                                   |      |
| <i>Not stated</i>                    | 216                        |      | 512                                                   |      |
| <b>Parity</b>                        |                            |      |                                                       |      |
| Primipara                            | 2,640                      | 46.1 | 25,132                                                | 41.1 |
| Multipara                            | 3,083                      | 53.9 | 35,993                                                | 58.9 |
| <i>Not stated</i>                    | 117                        |      | 0                                                     |      |
| <b>Pre-pregnancy BMI<sup>3</sup></b> |                            |      |                                                       |      |
| Underweight (BMI <18.50)             | 275                        | 5.2  | 3,161                                                 | 5.3  |
| Normal (BMI 18.50 - 24.99)           | 3,005                      | 57.1 | 30,394                                                | 50.6 |
| Overweight (BMI 25.00 - 29.99)       | 1,132                      | 21.5 | 14,745                                                | 24.6 |
| Obese (BMI ≥30.00)                   | 854                        | 16.2 | 11,758                                                | 19.6 |
| <i>Not stated</i>                    | 574                        |      | 1,054                                                 |      |
| <b>Maternal Country of Birth</b>     |                            |      |                                                       |      |
| Australia                            | 4,522                      | 80.0 | 47,093                                                | 77.0 |
| Outside Australia                    | 1,127                      | 20.0 | 14,032                                                | 23.0 |
| <i>Not stated</i>                    | 191                        |      | 0                                                     |      |

<sup>1</sup> Based on Queensland Perinatal Statistics report for 2011 births (n=61,125).

Queensland Health. *Perinatal statistics: Queensland 2011*. Brisbane, QLD: Queensland Department of Health; 2014.

<sup>2</sup> Figures for the Queensland population sample sourced from Australia's Mothers & Babies Report (n=61,112).

Li Z, Zeki R, Hilder L, Sullivan EA. *Australia's mothers and babies 2011. Perinatal statistics series no. 28. Cat. no. PER 59*. Canberra: AIHW National Perinatal Epidemiology and Statistics Unit; 2013.

<sup>3</sup> Figures from Australia's Mothers & Babies Report (n=61,112).

| Maternal Characteristics                    | Survey Sample<br>(N=5,840) |      | Queensland Population 2011<br>(N=61,125) <sup>1</sup> |      |
|---------------------------------------------|----------------------------|------|-------------------------------------------------------|------|
|                                             | N                          | %    | N                                                     | %    |
| <b>Place of Birth</b>                       |                            |      |                                                       |      |
| Public Hospital                             | 3,335                      | 57.1 | 41,901                                                | 68.5 |
| Private Hospital                            | 2,282                      | 39.1 | 17,885                                                | 29.3 |
| Birth Centre                                | 161                        | 2.8  | 841                                                   | 1.4  |
| Home                                        | 32                         | 0.5  | 69                                                    | 0.1  |
| Other                                       | 30                         | 0.5  | 429                                                   | 0.7  |
| <b>Facility Type</b>                        |                            |      |                                                       |      |
| Public                                      | 3,496                      | 59.9 | 42,742                                                | 69.9 |
| Private                                     | 2,282                      | 39.1 | 17,885                                                | 29.3 |
| Home births                                 | 32                         | 0.5  | 69                                                    | 0.1  |
| Other                                       | 30                         | 0.5  | 429                                                   | 0.7  |
| <b>Onset of Labour<sup>2</sup></b>          |                            |      |                                                       |      |
| Spontaneous                                 | 3,043                      | 53.1 | 34,335                                                | 56.2 |
| <i>No augmentation</i>                      | 1,694                      | 29.6 | 22,030                                                | 36.0 |
| <i>Medical augmentation</i>                 | 275                        | 4.8  | 3,800                                                 | 6.2  |
| <i>Surgical augmentation</i>                | 723                        | 12.6 | 6,455                                                 | 10.6 |
| <i>Combined augmentation</i>                | 245                        | 4.3  | 2,033                                                 | 3.3  |
| <i>Other/not stated</i>                     | 106                        | 1.9  | 17                                                    | 0.0  |
| Induced                                     | 1,461                      | 25.5 | 14,180                                                | 23.2 |
| <i>Medical only</i>                         | 635                        | 11.1 | 4,729                                                 | 7.7  |
| <i>Surgical only</i>                        | 165                        | 2.9  | 1,135                                                 | 1.9  |
| <i>Combined</i>                             | 653                        | 11.4 | 8,170                                                 | 13.4 |
| <i>Other/not stated</i>                     | 8                          | 0.1  | 146                                                   | 0.2  |
| No labour                                   | 1,222                      | 21.3 | 12,595                                                | 20.6 |
| <i>Not stated</i>                           | 114                        |      | 2                                                     |      |
| <b>Method of Birth<sup>4</sup></b>          |                            |      |                                                       |      |
| Non-instrumental vaginal                    | 3,095                      | 53.7 | 34,933                                                | 57.2 |
| Forceps                                     | 548                        | 1.7  | 1,142                                                 | 1.9  |
| Vacuum                                      | 96                         | 9.5  | 4,743                                                 | 7.8  |
| Forceps and vacuum                          | 55                         | 1.0  | n/a                                                   | -    |
| Caesarean – with labour                     | 743                        | 12.9 | 7,698                                                 | 12.6 |
| Caesarean – no labour                       | 1,222                      | 21.2 | 12,595                                                | 20.6 |
| <i>Not stated</i>                           | 81                         |      | 1                                                     |      |
| <b>Previous Caesarean Birth<sup>5</sup></b> |                            |      |                                                       |      |
| None                                        | 2,084                      | 69.1 | 25,282                                                | 70.2 |
| At least one                                | 932                        | 30.9 | 10,711                                                | 29.8 |
| <i>Not stated</i>                           | 67                         |      | 0                                                     |      |
| <b>Plurality of Pregnancy</b>               |                            |      |                                                       |      |
| Singleton                                   | 5,742                      | 98.3 | 60,098                                                | 98.3 |
| Twin                                        | 94                         | 1.6  | 1,001                                                 | 1.6  |
| Other multiple                              | 4                          | 0.1  | 24                                                    | 0.0  |
| <i>Not stated</i>                           | 0                          |      | 2                                                     |      |

<sup>4</sup> Figures from Australia's Mothers & Babies Report (n=61,112)

<sup>5</sup> Multiparous women only

Table 2. Infant characteristics: Comparison of survey respondents' infants and infants born in Queensland in 2011

| Infant Characteristics                 | Survey Sample<br>(N=5,942) |      | Queensland Population 2011<br>(N=61,780) <sup>6</sup> |      |
|----------------------------------------|----------------------------|------|-------------------------------------------------------|------|
|                                        | N                          | %    | N                                                     | %    |
| <b>Infant Gestational Age in Weeks</b> |                            |      |                                                       |      |
| Less than 28                           | 21                         | 0.4  | 325                                                   | 0.5  |
| 28-36                                  | 492                        | 8.4  | 4,801                                                 | 7.8  |
| 37-41                                  | 5,147                      | 88.4 | 56,299                                                | 91.1 |
| 42 or more                             | 164                        | 2.8  | 349                                                   | 0.6  |
| <i>Not stated</i>                      | <i>118</i>                 |      | <i>6</i>                                              |      |
| <b>Infant Birth Weight in Grams</b>    |                            |      |                                                       |      |
| Less than 1,500                        | 42                         | 0.7  | 696                                                   | 1.1  |
| 1,500-2,499                            | 322                        | 5.6  | 3,286                                                 | 5.3  |
| 2,500-4,499                            | 5,193                      | 90.9 | 56,683                                                | 91.8 |
| 4,500 and over                         | 159                        | 2.8  | 1,111                                                 | 1.8  |
| <i>Not stated</i>                      | <i>226</i>                 |      | <i>4</i>                                              |      |

<sup>6</sup> Figures for the Queensland population were sourced from the Queensland Health Perinatal Statistics report and were based on live singleton and multiple births in 2011.
