# Supplementary material for: Factors promoting or inhibiting normal birth
Source: Springer Nature journal article supplement (doi:10.1186/s12884-018-1871-5), 2018-06-18
Supplement: MOESM3 [file 15854210]

Additional File 3. Sample characteristics of women as frequencies and percentages

|                                                         |                                            | Total Sample<br>(N=5,840) <sup>^</sup> |        |
|---------------------------------------------------------|--------------------------------------------|----------------------------------------|--------|
|                                                         |                                            | N/Mean                                 | %/(SD) |
| <b>MATERNAL SOCIO-DEMOGRAPHIC CHARACTERISTICS</b>       |                                            |                                        |        |
| Maternal age in years                                   |                                            | 30.53                                  | (5.29) |
| Secondary education                                     |                                            |                                        |        |
|                                                         | <i>Not completed</i>                       | 491                                    | 8.7    |
|                                                         | <i>Completed</i>                           | 5,162                                  | 91.3   |
| Aboriginal and/or Torres Strait Islander identification |                                            |                                        |        |
|                                                         | <i>No</i>                                  | 5,536                                  | 98.4   |
|                                                         | <i>Yes</i>                                 | 89                                     | 1.6    |
| Area of residence                                       |                                            |                                        |        |
|                                                         | <i>Major city</i>                          | 3,514                                  | 63.1   |
|                                                         | <i>Inner regional</i>                      | 1,059                                  | 19.0   |
|                                                         | <i>Outer regional</i>                      | 845                                    | 15.2   |
|                                                         | <i>Remote/very remote</i>                  | 151                                    | 2.7    |
| <b>PREGNANCY DETAILS/COMPLICATIONS</b>                  |                                            |                                        |        |
| Parity                                                  |                                            |                                        |        |
|                                                         | <i>Multiparous – no previous caesarean</i> | 2,084                                  | 36.8   |
|                                                         | <i>Multiparous – previous caesarean</i>    | 932                                    | 16.5   |
|                                                         | <i>Primiparous</i>                         | 2,640                                  | 46.7   |
| Plurality                                               |                                            |                                        |        |
|                                                         | <i>Single</i>                              | 5,742                                  | 98.3   |
|                                                         | <i>Multiple</i>                            | 98                                     | 1.7    |
| Pre-pregnancy BMI ( $kg/m^2$ )                          |                                            |                                        |        |
|                                                         | <i>Underweight (&lt;18.5)</i>              | 275                                    | 5.2    |
|                                                         | <i>Normal (18.5-25.0)</i>                  | 3,005                                  | 57.1   |
|                                                         | <i>Overweight (25.0-30.0)</i>              | 1,132                                  | 21.5   |
|                                                         | <i>Obese (&gt;30.0)</i>                    | 854                                    | 16.2   |
| Gestational age in weeks                                |                                            | 39.25                                  | (2.02) |
| Gestational diabetes                                    |                                            |                                        |        |
|                                                         | <i>No</i>                                  | 5,233                                  | 91.5   |
|                                                         | <i>Yes</i>                                 | 484                                    | 8.5    |
| High blood pressure                                     |                                            |                                        |        |
|                                                         | <i>No</i>                                  | 5,084                                  | 89.1   |
|                                                         | <i>Yes</i>                                 | 624                                    | 10.9   |
| Low lying placenta                                      |                                            |                                        |        |
|                                                         | <i>No</i>                                  | 5,229                                  | 91.6   |
|                                                         | <i>Yes</i>                                 | 478                                    | 8.4    |
| Other risk factors                                      |                                            |                                        |        |
|                                                         | <i>No</i>                                  | 3,482                                  | 60.7   |
|                                                         | <i>Yes</i>                                 | 2,255                                  | 39.3   |
| <b>ANTENATAL AND INTRAPARTUM CARE</b>                   |                                            |                                        |        |
| Model of care                                           |                                            |                                        |        |
|                                                         | <i>Private obstetric care</i>              | 2,355                                  | 43.9   |
|                                                         | <i>Standard public care</i>                | 1,070                                  | 19.9   |
|                                                         | <i>GP shared care</i>                      | 1,224                                  | 22.8   |
|                                                         | <i>Public midwifery continuity care</i>    | 684                                    | 12.7   |
|                                                         | <i>Private midwifery care</i>              | 37                                     | 0.7    |
| Known care providers – labour/birth                     |                                            |                                        |        |
|                                                         | <i>None of them</i>                        | 1,896                                  | 33.1   |
|                                                         | <i>Some of them</i>                        | 3,434                                  | 60.0   |
|                                                         | <i>All of them</i>                         | 391                                    | 6.8    |

|                                       |                               | Total Sample<br>(N=5,840) <sup>^</sup> |        |
|---------------------------------------|-------------------------------|----------------------------------------|--------|
|                                       |                               | N/Mean                                 | %/(SD) |
| Continuity of care – labour/birth     |                               |                                        |        |
|                                       | <i>No</i>                     | 1,592                                  | 27.8   |
|                                       | <i>Yes</i>                    | 4,131                                  | 72.2   |
| Rushed/hurried during labour          |                               |                                        |        |
|                                       | <i>No</i>                     | 3,837                                  | 89.9   |
|                                       | <i>Yes</i>                    | 430                                    | 10.1   |
| <b>LABOUR/BIRTH EXPERIENCE</b>        |                               |                                        |        |
| Continuous fetal monitoring           |                               |                                        |        |
|                                       | <i>No</i>                     | 1,997                                  | 47.8   |
|                                       | <i>Yes</i>                    | 2,177                                  | 52.2   |
| Augmentation of labour                |                               |                                        |        |
|                                       | <i>Yes</i>                    | 1,764                                  | 30.8   |
|                                       | <i>No</i>                     | 3,798                                  | 66.2   |
|                                       | <i>Not sure</i>               | 172                                    | 3.0    |
| Freedom of movement throughout labour |                               |                                        |        |
|                                       | <i>No</i>                     | 2,306                                  | 53.6   |
|                                       | <i>Yes</i>                    | 1,994                                  | 46.4   |
| Water immersion – labour              |                               |                                        |        |
|                                       | <i>No</i>                     | 3,693                                  | 86.3   |
|                                       | <i>Yes</i>                    | 588                                    | 13.7   |
| Time of birth                         |                               |                                        |        |
|                                       | <i>Inside business hours</i>  | 2,241                                  | 38.4   |
|                                       | <i>Outside business hours</i> | 3,599                                  | 61.6   |
| Position during birth                 |                               |                                        |        |
|                                       | <i>Supine</i>                 | 2,674                                  | 70.9   |
|                                       | <i>Non-supine</i>             | 1,097                                  | 29.1   |

SD = Standard deviation; Frequencies may not total 5,840 due to missing data or questions being not applicable for some women.
